# Supplementary material for: A lot to unpack: a decade in high Z′ crystal structures
Source: Royal Society of Chemistry journal article supplement (doi:10.1039/d4ce01186d), 2025-01-01
Supplement: d4ce01186d1.pdf [file d4ce01186d1.pdf]

## Supplementary Information

### A lot to unpack: A decade in high $Z'$ crystal structures

Paul G. Waddell<sup>1</sup>

<sup>1</sup>School of Natural and Environmental Sciences, Bedson Building, Newcastle University, Newcastle upon Tyne, NE1 7RU, UK

**Table S1** Details of the structures referenced in this work (in order of appearance)

| CSD Refcode | $Z'$ | Space Group  | Chemical name                                    | Structure                                                                             |
|-------------|------|--------------|--------------------------------------------------|---------------------------------------------------------------------------------------|
| BOHYIK      | 2    | $P2_1$       | Dimethylshikamide                                | 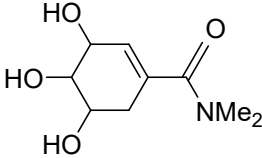   |
| CAMBAV02    | 4    | $P2_1/n$     | 2-(thiophen-2-yl)-1,3-benzothiazole              |    |
| CAMBAV03    | 4    | $P-1$        |                                                  |                                                                                       |
| EGULOK      | 8    | $P-1$        |                                                  |                                                                                       |
| CAMBAV      | 2    | $P2_1/c$     |                                                  |                                                                                       |
| SUXLII      | 2    | $P-1$        | (Z)-2-Fluoro-N'-phenyl benzamide                 |  |
| SUXLII01    | 3    | $P-1$        |                                                  |                                                                                       |
| MARJEY      | 4    | $P1$         | Boc-L-methionyl glycine ester                    |  |
| MARJEY01    | 8    | $P1$         |                                                  |                                                                                       |
| MARJEY02    | 4    | $P1$         |                                                  |                                                                                       |
| MARJEY03    | 4    | $P1$         |                                                  |                                                                                       |
| WEVWOK      | 7    | $P2_12_12_1$ | Glycyl-L-valine                                  |  |
| WEVWOK01    | 1    | $P2_12_12_1$ |                                                  |                                                                                       |
| WEVWOK02    | 1    | $P2_12_12_1$ |                                                  |                                                                                       |
| KOSSIY      | 2    | $P2_1/c$     | (E)-N'-diphenylmethylene-4-hydroxybenzohydrazide |  |
| KOSSIY01    | 1    | $P2_1/c$     |                                                  |                                                                                       |
| KOSSIY02    | 6    | $P2_1$       |                                                  |                                                                                       |
| KOSSIY03    | 2    | $P2_1/c$     |                                                  |                                                                                       |
| KOSSIY04    | 2    | $P-1$        |                                                  |                                                                                       |
| KOSSIY05    | 1    | $P2_1/c$     |                                                  |                                                                                       |
| BOHYUW      | 12   | $P2_1$       | Methyl shikimate ester                           |  |
| WIYKUO      | 6    | $P1$         | Daphneillata C                                   |  |

|                       |    |                 |                                                                     |                                                                                       |
|-----------------------|----|-----------------|---------------------------------------------------------------------|---------------------------------------------------------------------------------------|
| OTOGOW                | 8  | $P_1$           | (2-bromophenyl)(pentafluorophenyl) methanol                         | 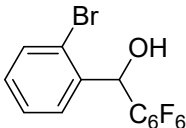   |
| LUXYOU03              | 12 | $P_{2_1/c}$     | 6-cyclohexyl-1-hydroxy-4-methylpyridin-2(1H)-one                    |    |
| NICOAM09/<br>NICOAM12 | 20 | $P_{2_1}$       | Nicotinamide                                                        |    |
| QAXMEH57              | 2  | $P-1$           | 5-methyl-2-((nitrophenyl)amino)-3-thiophenecarbonitrile             |    |
| AZOMAG04              | 16 | $P_{2_1}$       | (R)-diethyl N-[(1-phenylethyl)carbamothioyl]phosphoramidate         |    |
| AYADOW01              | 12 | $P-1$           | 5,8-dimethyl-4H-naphtho[2,3-d][1,2,3]dithiazol-4-one-9-oxyl radical |   |
| DAKCEX07              | 4  | $P_{2_1/c}$     | 6-azidotetrazolo[5,1-a]phthalazine                                  |  |
| DAKCEX08              | 16 | $P-1$           |                                                                     |                                                                                       |
| DAKCEX09              | 8  | $P_{2_1/c}$     |                                                                     |                                                                                       |
| LUBVUC                | 13 | $P-1$           | 2-bromo-2H-1,3,2-benzodithiarsole                                   |  |
| KEFSUM                | 17 | $P-1$           | 2-chloro-2H-1,3,2-benzodithiarsole                                  |  |
| LOFRAD/<br>LOFRAD01   | 29 | $P_{2_1}2_12_1$ | White phosphorus                                                    |  |
| OYACEX01              | 12 | $P_{2_1/n}$     | 3-benzoyl-4-hydroxy-6-phenyl-2H-pyran-2-one                         |  |
| OYACEX                | 1  | $P_{2_1/n}$     |                                                                     |                                                                                       |
| EKAXEV01              | 16 | $P_{2_1}$       | Parvistone E                                                        |  |
| EKAXEV                | 4  | $P_{2_1}$       |                                                                     |                                                                                       |

|                     |    |             |                                                                                |  |
|---------------------|----|-------------|--------------------------------------------------------------------------------|--|
| IQEQUT              | 12 | $P_{2,1/n}$ | 3-(1-aminoethylidene)-1,3-dihydro-2H-indol-2-one                               |  |
| ZINXAY              | 12 | $P-1$       | 1-(5-ethoxy-2-methyl-4-phenyl-1H-pyrrol-3-yl)ethan-1-one                       |  |
| RABZIH              | 15 | $P-1$       | [4-(dimethylamino)-3-(dodecylsulfanyl)but-3-en-2-ylidene]propanedinitrile      |  |
| CIDHAB/<br>CIDHAB01 | 1  | $P-1$       | 4-(4-chlorophenyl)-3-nitro-1,2-oxazole                                         |  |
| KEJZEI              | 16 | $P1$        | 3-(trifluoromethyl)-3,4-dihydro-2H-1-benzopyran-4-ol                           |  |
| OFEREZ              | 24 | $P1$        | 6-(5,6-dimethoxy-1-benzothiophen-2-yl)-5-methyl-4,5-dihydropyridazin-3(2H)-one |  |
